# Supplementary material
Source: PubMed Central journal article supplement (PMC3344999)
Supplement: 1201204109_pnas.201201204SI.pdf [file 1201204109_pnas.201201204SI.pdf]

# Supporting Information

Kar et al. 10.1073/pnas.1201204109

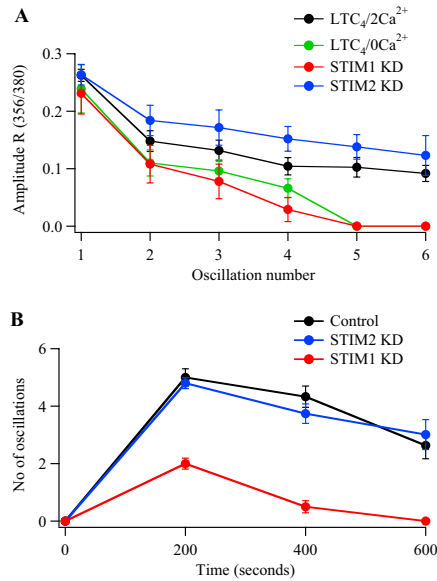

**Fig. S1.** Knockdown of STIM1 but not STIM2 alters the pattern of Ca<sup>2+</sup> oscillations to LTC<sub>4</sub>. (A) The amplitude of each Ca<sup>2+</sup> oscillation is plotted against oscillation number for the conditions shown. Each point represents >16 cells. (B) The number of oscillations (measured in 200-s bins) is plotted against time for control cells (stimulated with 120 nM LTC<sub>4</sub>) and after knockdown of STIM1 and STIM2. Each point represents >14 cells.

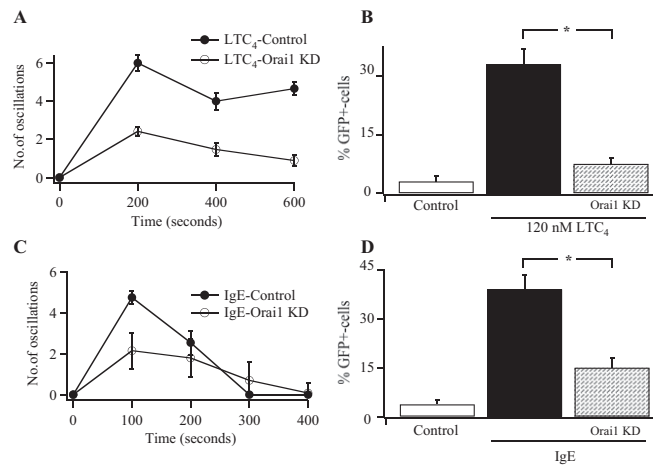

**Fig. S2.** Ca<sup>2+</sup> responses and gene expression are reduced by Orai1 knockdown. (A) Ca<sup>2+</sup> oscillations to CysLT1 receptor activation run down more quickly when Orai1 expression is reduced. Each point represents >23 cells. (B) NFAT-driven gene expression in response to LTC<sub>4</sub> is reduced after knockdown of Orai1. Each histogram is the aggregate of several experiments. (C) The number of Ca<sup>2+</sup> oscillations to IgE is reduced by Orai1 knockdown. Each point represents >21 cells. (D) Orai1 knockdown reduces the fraction of cells expressing NFAT-driven GFP in response to IgE. Each histogram is the aggregate of several experiments. \**P* < 0.05.

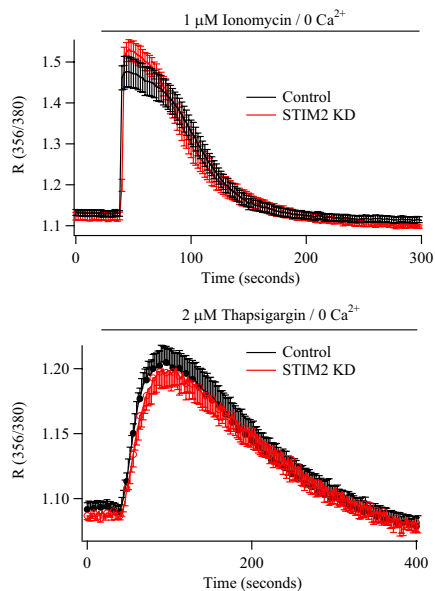

**Fig. S3.** STIM2 knockdown does not affect the  $Ca^{2+}$  content of the stores. (*Upper*) Stimulation with ionomycin in  $Ca^{2+}$ -free external solution releases  $Ca^{2+}$  rapidly from internal stores. The extent of  $Ca^{2+}$  release and subsequent  $Ca^{2+}$  removal were unaffected by knockdown of STIM2. (*Lower*) Thapsigargin (2  $\mu$ M) was used to release  $Ca^{2+}$ . Graphs are averages of >15 cells each.

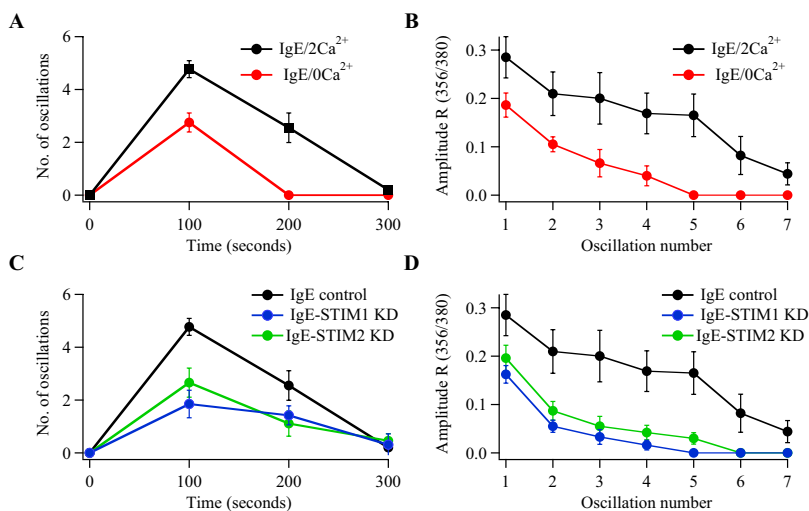

**Fig. S4.** Effect of STIM protein knockdown on the pattern of  $Ca^{2+}$  oscillations evoked by IgE. (*A*) The number of  $Ca^{2+}$  oscillations per 100-s bin is compared for cells stimulated with IgE in 2 mM external  $Ca^{2+}$  or  $Ca^{2+}$ -free solution. (*B*) The amplitude of each  $Ca^{2+}$  oscillation is compared for the two conditions shown. (*C*) The number of  $Ca^{2+}$  oscillations per 100-s bin is compared between control cells and cells in which either STIM1 or STIM2 had been knocked down. (*D*) The amplitude of each  $Ca^{2+}$  oscillation is compared for the different conditions. Each graph represents >18 cells.

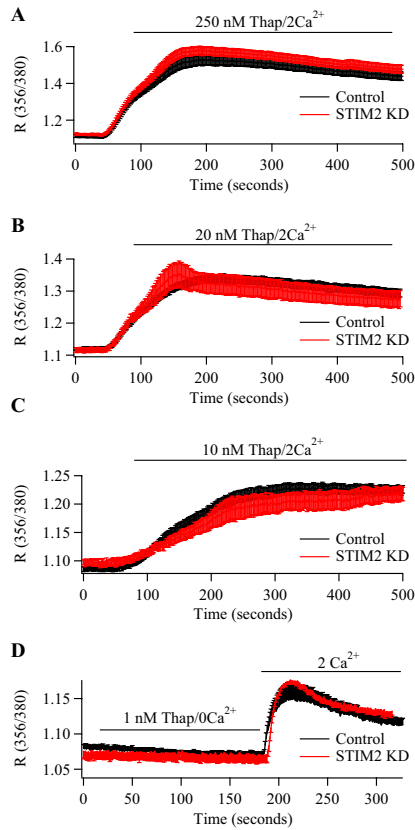

**Fig. 55.** STIM2 knockdown has no effect on store-operated  $\text{Ca}^{2+}$  entry evoked by a range of thapsigargin concentrations. (**A**) Responses are compared between control (mock-transfected) and STIM2 knockdown cells after stimulation with 250 nM thapsigargin. (**B**) As in **A**, but 20 nM thapsigargin was used. (**C**) As in **A**, but 10 nM thapsigargin was used. (**D**) Cells were stimulated with 1 nM thapsigargin in  $\text{Ca}^{2+}$ -free solution and then 2 mM external  $\text{Ca}^{2+}$  was readmitted, as shown. Each graph summarizes data from >30 cells.

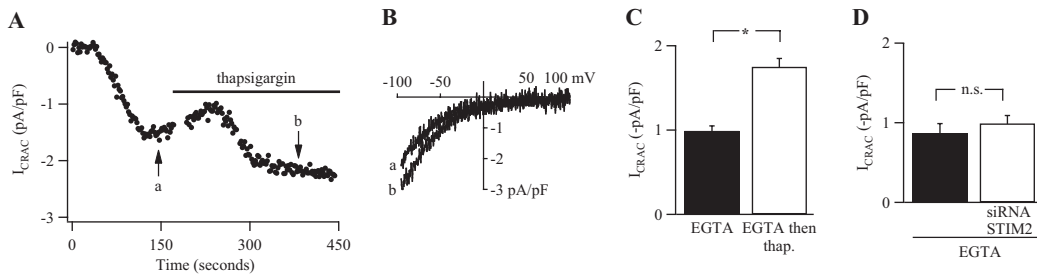

**Fig. 56.** Partial activation of  $I_{\text{CRAC}}$  is unaffected by STIM2 knockdown. (**A**) Whole cell dialysis with 2 mM EGTA led to activation of submaximal  $I_{\text{CRAC}}$ . Subsequent application of thapsigargin (2  $\mu\text{M}$ ) produced a larger current. (**B**) Current-voltage relationships, taken at the indicated points in **A**, are shown. (**C**) Histograms compare the size of  $I_{\text{CRAC}}$  for cells dialyzed with 2 mM EGTA versus 2 mM EGTA followed by thapsigargin (six cells for each bar). (**D**) The size of  $I_{\text{CRAC}}$  is compared for the conditions shown (five cells for EGTA and seven cells for STIM2). EGTA refers to 2 mM EGTA.
